# Supplementary material for: Air-stable lead-free hybrid perovskite employing self-powered photodetection with an electron/hole-conductor-free device geometry
Source: Royal Society of Chemistry journal article supplement (doi:10.1039/c8nr08959k), 2018-12-17
Supplement: c8nr08959k1.pdf [file c8nr08959k1.pdf]

## **Electronic Supplementary Information**

### **Air Stable Lead-Free Hybrid Perovskite Employing Self-Powered Photodetection with Electron/Hole Conductor Free Device Geometry**

*Amreen A. Hussain<sup>1\*</sup>, Amit K. Rana<sup>1,2#</sup>, Mukesh Ranjan<sup>1</sup>*

<sup>1</sup>Facilitation Centre for Industrial Plasma Technologies (FCIPT), Institute for Plasma Research  
(IPR), Gandhinagar, Gujarat, India, 382016

\*Correspondence to: amreenhussain8888@gmail.com, amreen.hussain@ipr.res.in

<sup>2#</sup>Present Address: Department of Electrical Engineering, Incheon National University, 119  
Academy Rd. Yeonsu, Incheon, 22012, Republic of Korea.

**Table S1** Prominent diffraction peaks appeared in the XRD pattern of MABI perovskite. The Bragg positions are compared with the previously reported data for MABI perovskite structure (CCDC 1433118).<sup>1</sup> Only the obtained XRD peaks are distinguished and compared here.

| <b>2<math>\theta</math> (degree)</b><br><b>As-deposited MABI</b> | <b>2<math>\theta</math> (degree)</b><br><b>(CCDC 1433118)<sup>1</sup></b> | <b>h</b> | <b>k</b> | <b>l</b> |
|------------------------------------------------------------------|---------------------------------------------------------------------------|----------|----------|----------|
| 11.88                                                            | 11.89475                                                                  | 1        | 0        | 0        |
| 12.57                                                            | 12.57669                                                                  | 1        | 0        | 1        |
| 14.41                                                            | 14.43341                                                                  | 1        | 0        | 2        |
| 16.28                                                            | 16.33362                                                                  | 0        | 0        | 4        |
| 17.06                                                            | 17.09364                                                                  | 1        | 0        | 3        |
| 22.24                                                            | 22.25707                                                                  | 2        | -1       | 2        |
| 23.70                                                            | 23.72800                                                                  | 1        | 0        | 5        |
| 24.58                                                            | 24.60622                                                                  | 0        | 0        | 6        |
| 25.30                                                            | 25.30816                                                                  | 2        | 0        | 2        |
| 26.46                                                            | 26.46277                                                                  | 2        | -1       | 4        |
| 26.92                                                            | 26.94912                                                                  | 2        | 0        | 3        |
| 29.10                                                            | 29.10239                                                                  | 2        | 0        | 4        |
| 31.62                                                            | 31.67397                                                                  | 2        | 0        | 5        |
| 31.30                                                            | 31.32599                                                                  | 1        | 0        | 7        |
| 32.07                                                            | 32.09452                                                                  | 3        | -1       | 2        |
| 34.28                                                            | 34.29434                                                                  | 3        | -1       | 3        |
| 37.74                                                            | 37.76677                                                                  | 2        | 0        | 7        |
| 41.15                                                            | 41.17752                                                                  | 2        | 0        | 8        |
| 42.06                                                            | 42.06933                                                                  | 4        | -2       | 0        |
| 44.30                                                            | 44.27955                                                                  | 3        | 0        | 6        |
| 44.70                                                            | 44.70218                                                                  | 4        | -1       | 2        |
| 62.68                                                            | 62.72404                                                                  | 5        | -1       | 6        |

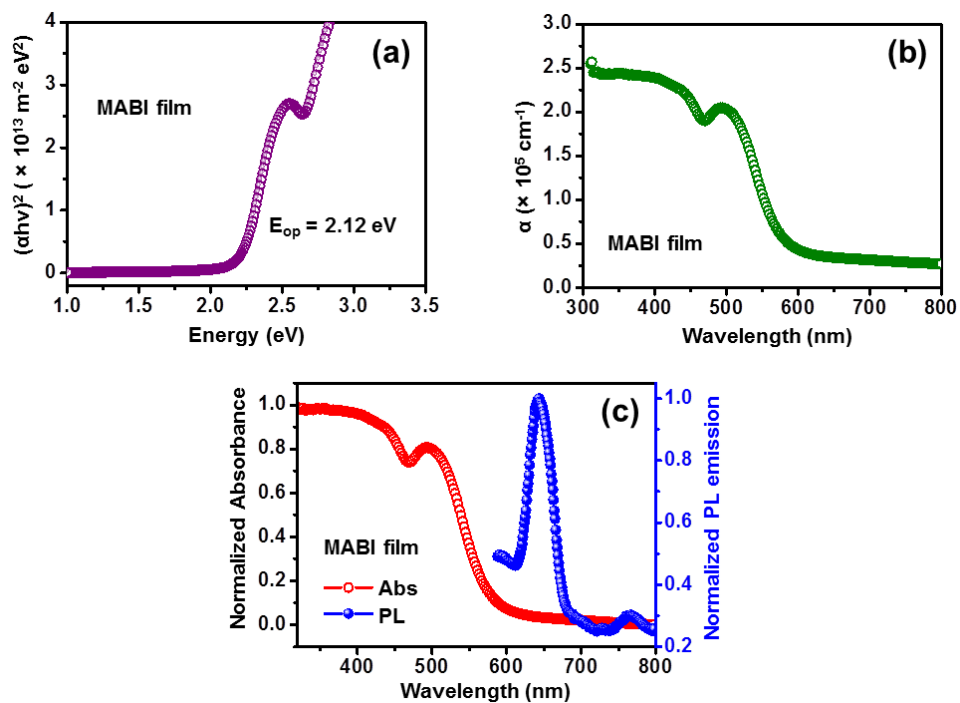

**Fig. S1** (a) Tauc plot of MABI film with an estimated optical bandgap of 2.12 eV. (b) The plot of absorption coefficient ( $\alpha$ ) versus wavelength of MABI film obtained from UV-Visible spectroscopy. (c) Absorbance and PL spectra of MABI film. The excitation wavelength is 500 nm (for PL).

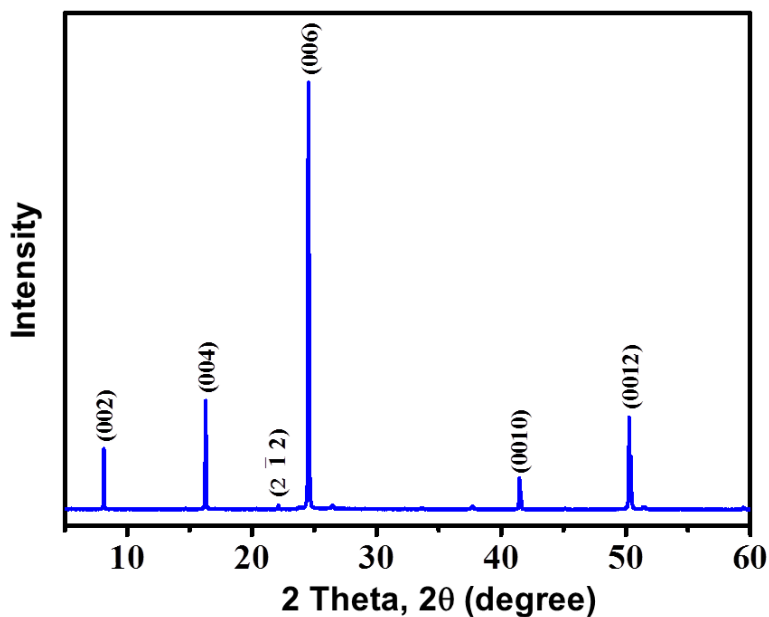

**Fig. S2** XRD pattern of MABI hexagonal crystal, showing the  $c$ -axis orientation.

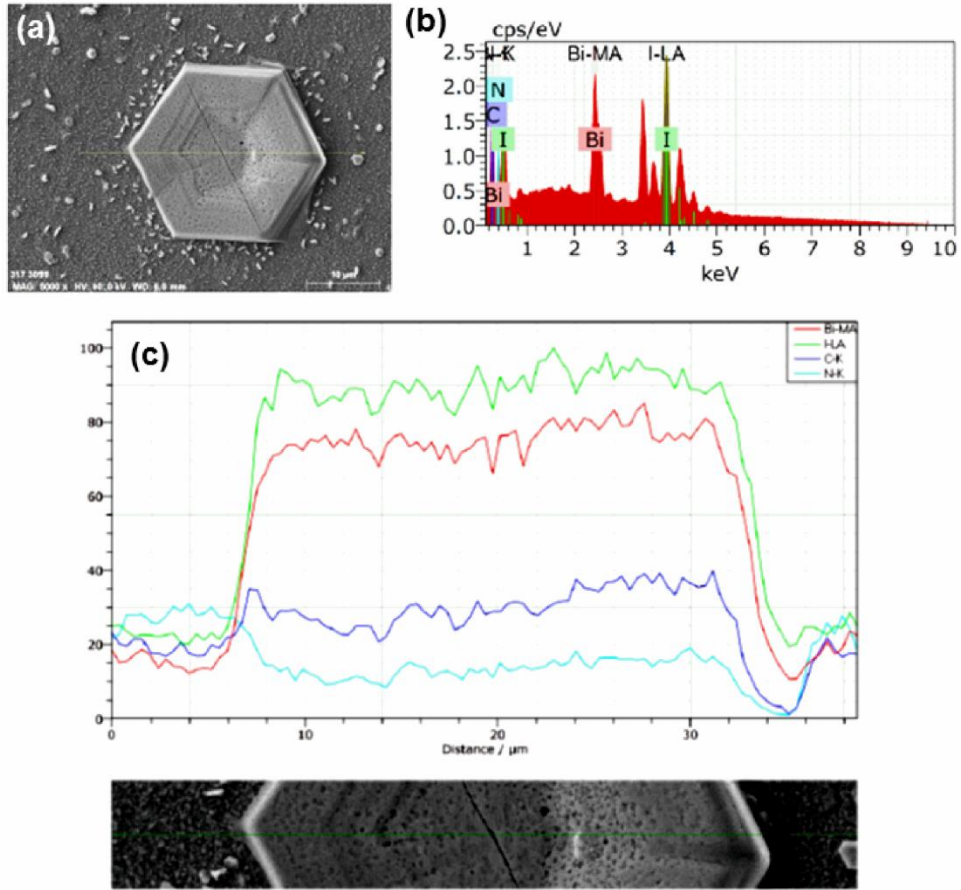

**Fig. S3** (a) FESEM image displaying a single hexagonal MABI crystal. (b) The corresponding elemental distribution within the hexagonal MABI crystal. (c) line profile showing the percentage of the constituents forming the MABI crystal.

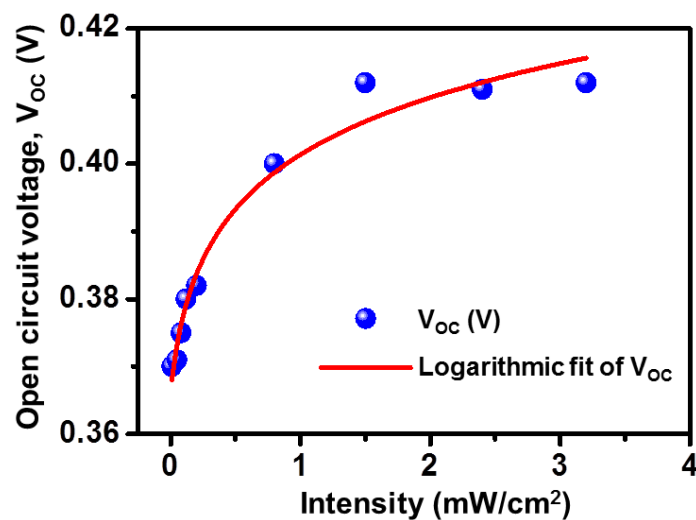

**Fig. S4** Open circuit voltage ( $V_{oc}$ ) as a function of light intensity for MABI photodetector

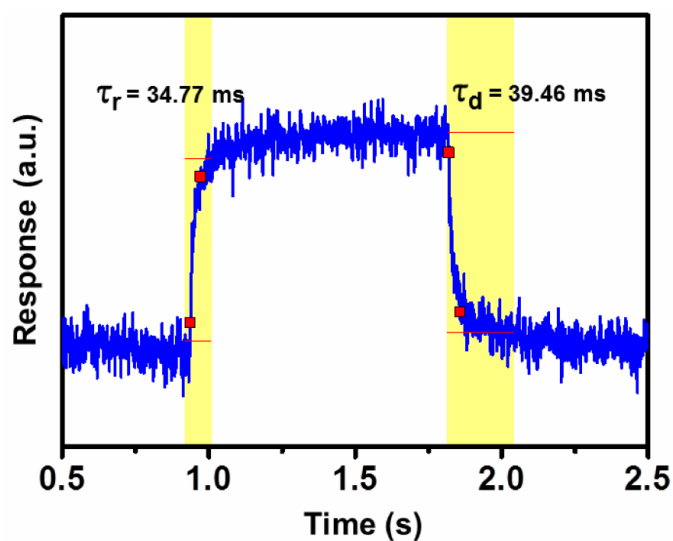

**Fig. S5** Single cycle on-off photo-switching of the MABI photodetector with white light illumination recorded at a fixed bias of 0.8 V.

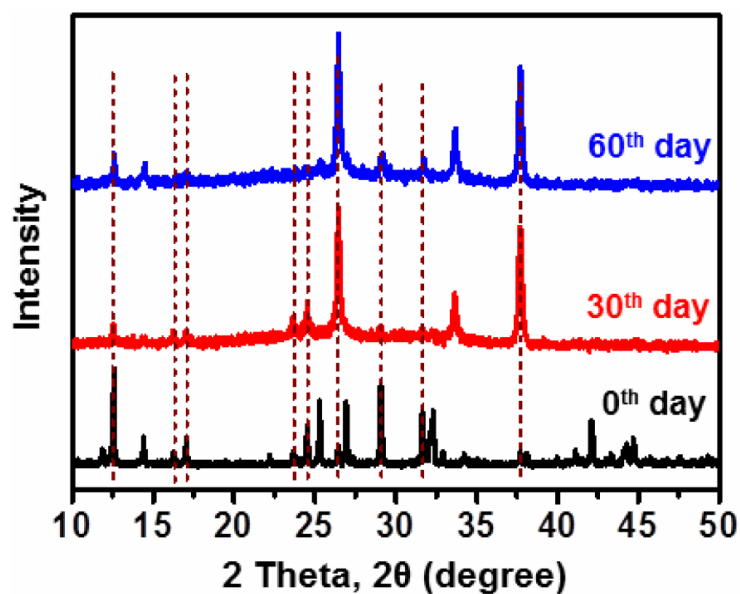

**Fig. S6** Comparison of XRD patterns of MABI film after storage for two months.

## References

1 K. Eckhardt, V. Bon, J. Getzschmann, J. Grothe, F. M. Wisser and S. Kaskel, *Chem. Commun.* 2016, **52**, 3058–3060.
